# Supplementary material for: A Blueprint to Advance Colorectal Cancer Immunotherapies
Source: Oxford University Press journal article supplement (doi:10.1158/2326-6066.cir-17-0375), 2017-10-16
Supplement: 23266066cir170375-sup-186539_2_supp_4299608_xx06k8.docx [file 23266066cir170375-sup-186539_2_supp_4299608_xx06k8.docx]

**Supplementary Table S1. Therapeutic strategies and corresponding laboratory tests.** Various immunologically related therapeutic strategies with corresponding questions and laboratory tests required for further study in combination immunotherapy.

**Supplementary Table S2. Policy and Infrastructure driven solutions noted for support of immunology work.** Infrastructure support work for CRC in immunotherapy and the numerous questions to be answered.
