# Supplementary material for: A Blueprint to Advance Colorectal Cancer Immunotherapies
Source: Oxford University Press journal article supplement (doi:10.1158/2326-6066.cir-17-0375), 2017-10-16
Supplement: 23266066cir170375-sup-186539_2_supp_4299609_mx06k8.xlsx [file 23266066cir170375-sup-186539_2_supp_4299609_mx06k8.xlsx]

## Sheet: Table 2
Therapeutic Strategy	Questions to be answered	Laboratory Test
Radiation	Is there (immunogenic) cell death?	IHC for autophagic markers
	Is there a change in T cell clonality?	CDR3 spectratyping/deep sequencing
	Are there unique antigens the T cells are recognizing	Neoag discovery/RNA seq and whole exome sequencing
Chemotherapy	Is there (immunogenic) cell death?	IHC for autophagic markers
	Is there a change in T cell clonality?	CDR3 spectratyping/deep sequencing
	Are there unique antigens the T cells are recognizing	Neoag discovery/RNA seq and whole exome sequencing
Epigenetic Modifiers	Are new antigens expressed	IHC for autophagic markers
	Is there a change in T cell clonality?	CDR3 spectratyping/deep sequencing
	Is the cytokine profile changes	Neoag discovery/RNA seq and whole exome sequencing
		NanoString-based immune-related gene signatures
Modulating TME (VEGF, CSF1R, IDO, CD73 inhibition)	What does the tumor look like?	Multiplex IHC TME markers
	Can T cells get inside the tumor?	Multiplex IHC for T cell infiltrates (CD8, CD4, Tregs, and various ratios)
	Is there an immunological response?	Immune phenotyping (Flow cytometry/CytoF, ICC, TCR sequencing analysis, ex vivo cytoxcity assays)
EGFR/MEK/JAK	Is there a secondary immunological response?	Immune phenotyping (Flow cytometry/CytoF, ICC, TCR sequencing analysis, ex vivo cytoxcity assays)
Checkpoint blockade (PD-1/L1, CTLA4)	Level of expression in tumor?	Multiplex IHC in tumor (CTLA4,PDL1, LAG3, TIM3 etc)
	Can T cells get inside the tumor?	Multiplex IHC for T cell infiltrates (CD8, CD4, Tregs, and various ratios)
	Are there long lasting memory T cells?	TCR spectratyping
	Pro-inflammatory cytokine expression?	Cytokine bead array
Vaccine	Is there expression of target ag in tumor?	IHC of ag expression
	Can T cells get inside the tumor?	Multiplex IHC for T cell infiltrates (CD8, CD4, Tregs, and various ratios)
	Are there long lasting memory T cells?	TCR spectratyping
	Pro-inflammatory cytokine expression?	Cytokine bead array (on peripheral blood or T cells extracted from tumor)
	Is there a humoral response?	NanoString-based immune-related gene signatures
		Elispot
CAR T	Is the ag being targeted?	IHC of tumor expression
	Are there on-target, off-tumor toxicities?	Cytokine bead array
	Are the CAR T cells long lasting?	Immune phenotyping (Flow cytometry/CytoF, ICC, TCR seq analysis, ex vivo cytoxcity assays)
TLRs	Are immune cells getting inside tumor?	Multiplex IHC for T cell infiltrates (CD8, CD4, Tregs, and various ratios)
	Is there an immunological response?	Immune phenotyping (Flow cytometry, ICC, TCR sequencing analysis, ex vivo cytoxcity assays)
Aspirin	Are immune cells getting inside tumor?	Multiplex IHC for T cell infiltrates (CD8, CD4, Tregs, and various ratios)
	Is there an immunological response?	Immune phenotyping (Flow cytometry/CytoF, ICC, TCR sequencing analysis, ex vivo cytoxcity assays)
Microbiome	Does microbiome dysbiosis differ amongst subtypes of CRC?	16s rRNA sequencing, metagenomics, structural microbiology (e.g., biofilms), classic and molecular microbiology, antigen-specific immune responses, RNAseq
	Is there a microbiome signature that is prognostic?
	Is there an ‘immune-promoting’ microbiome therapeutic?
