# Supplementary material for: A Blueprint to Advance Colorectal Cancer Immunotherapies
Source: Oxford University Press journal article supplement (doi:10.1158/2326-6066.cir-17-0375), 2017-10-16
Supplement: 23266066cir170375-sup-186539_2_supp_4299610_hx06k8.xlsx [file 23266066cir170375-sup-186539_2_supp_4299610_hx06k8.xlsx]

## Sheet: Table 3
Infrastructure Support Work of CRC Immunotherapy	Questions to be answered
Guideline Development with MSI Testing and Reimbursement	What barriers exist to universal MSI testing on colorectal cancers?
	What are the specific areas to address from a payment issue?
	What are the specific issue with policy issues?
	Are there already existing efforts for us to collaborate or partner?
Data and Sample Sharing for Immunotherapy	What are the primary issues related to sharing of laboratory and clinical databases?
	What are the issues of sharing tissue and bio specimen samples?
	What are opportunities to engage with industry and academic centers (does Moonshot provide any opportunity)?
	Are there already existing efforts for us to collaborate or partner (such as common data sets and electronic health records)?
Validation and Protocol Development for CRC Immunology Specific Protocols	How to integrate comments from basic scientists and immunologists to help develop standard protocols to aid GI clinical teams to conduct immunologic research?
	What’s needed for standardization in protocol and trial design?
	Regarding Biomarkers and immune correlate studies: What samples are available? How do we collect this information? How should samples be dispatched to lab of reference for specific techniques?
	What are the end points for us to consider?
	Should there be a standardized definition of what denotes an immune response? This also means a need to standardize lab assays and reagents.
	Are there already existing efforts for us to collaborate or partner?
Database of published and scientific papers in cancer immunotherapy.	What would be helpful for culling published or nearly published works in the area of immunotherapy?
	Are there already existing efforts for us to collaborate or partner?
Preclinical Models	Can humanized preclinical models accurately predict response to checkpoint inhibitors?
	Can humanized preclinical models be successfully used to test rational combination strategies for immunotherapy?
	Improvement in biospecimen research (NOT SURE WHAT THIS MEANS, CLS)
	Are animal models viable options?
	Are there already existing efforts for us to collaborate or partner?
Research Funding Advocacy for increased funding in CRC Immunotherapy	NCI, NIH and CDC are potential partners in this effort, whom else?
	What additional policy measures should be priority for funding?
	How and what provocative questions should we propose to NIH in immediate future?
Clinical Trial Recruitment	How do we ensure there is shared decision making with patients and providers around clinical options? Including clinical trials?
	How do we ensure that clinical trials are offered as an initial course of therapy?
	What are the strategies to ensure patients have routine biomarker testing and appropriately matched immunotherapy treatment options?
